# Supplementary material for: Synthesis, characterization and photocatalytic activity of Zn(OH)F hierarchical nanofibers prepared by a simple solution-based method
Source: Royal Society of Chemistry journal article supplement (doi:10.1039/c2ce06389a), 2012-01-01
Supplement: c2ce06389a.pdf [file c2ce06389a.pdf]

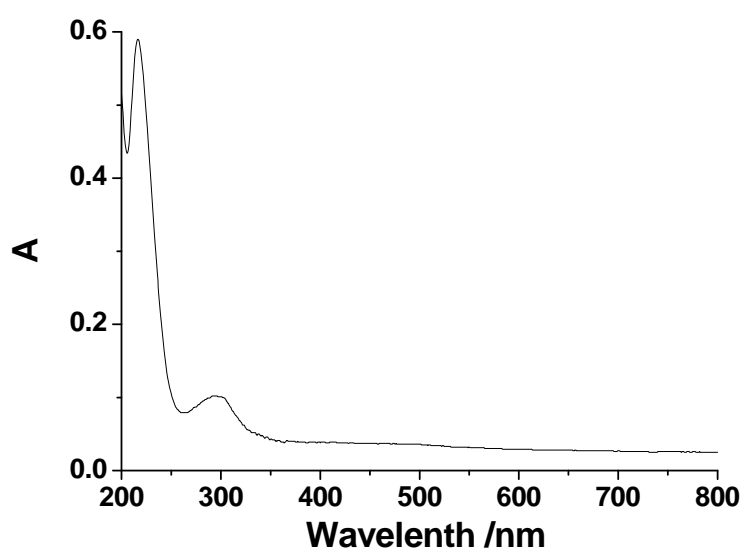

**Fig.1S** DRS spectra of Zn(OH)F nanofibers

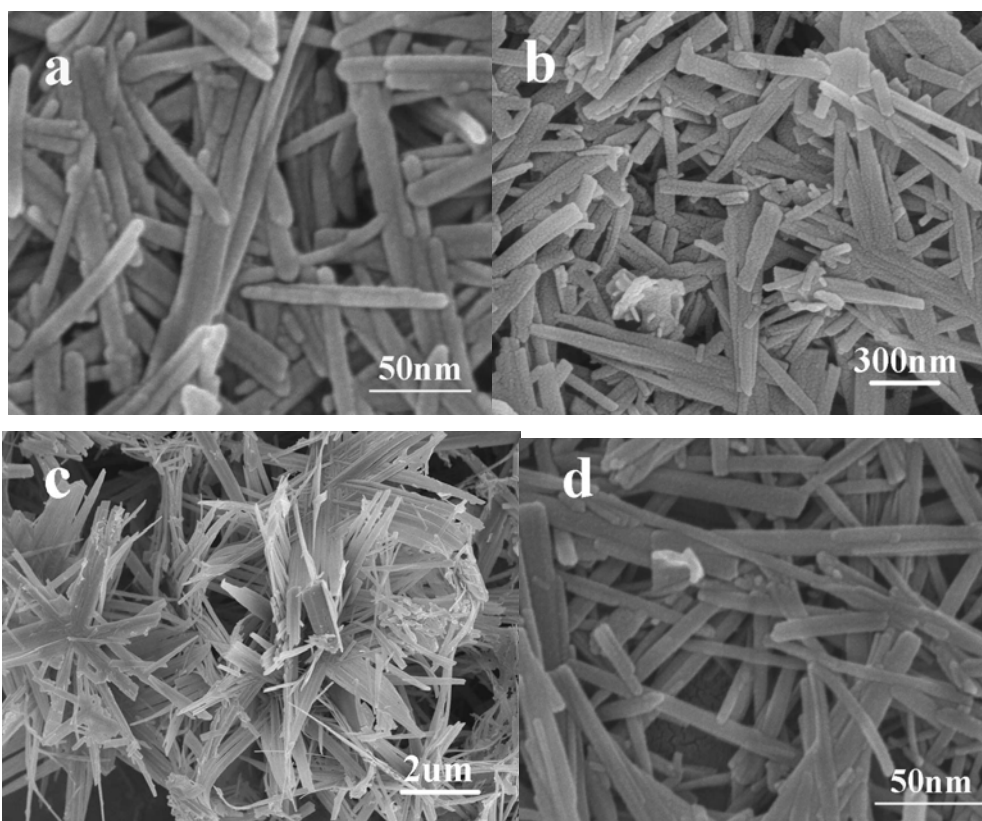

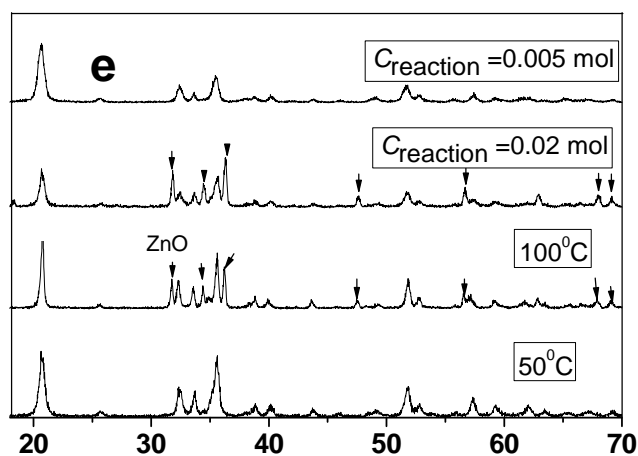

**Fig. S2** The SEM images of the obtained products for different concentrations of the reactants (a-b) and reactive temperature (c-d) and their XRD patterns (e), (a)  $[\text{Zn}(\text{NO}_3)_2] = [\text{HMT}] = 0.005 \text{ mol}$ ; (b)  $[\text{Zn}(\text{NO}_3)_2] = [\text{HMT}] = 0.02 \text{ mol}$ , (c)  $100^\circ\text{C}$  and (d)  $50^\circ\text{C}$ , ( $\text{NaF} = 0.005 \text{ mol}$ )

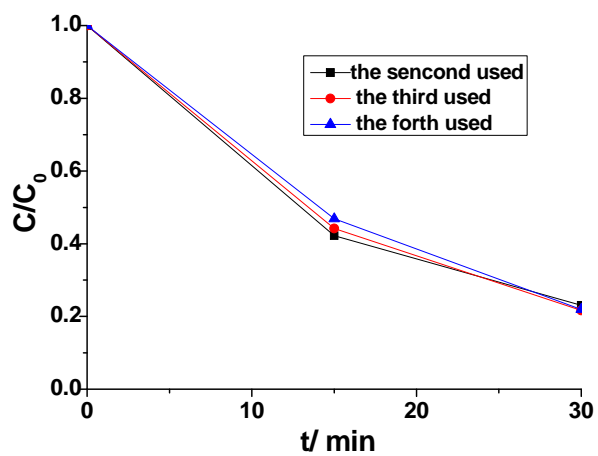

**Fig. 3S.** Irradiation–time dependence of the relative concentration  $C/C_0$  of the MB dye in solution

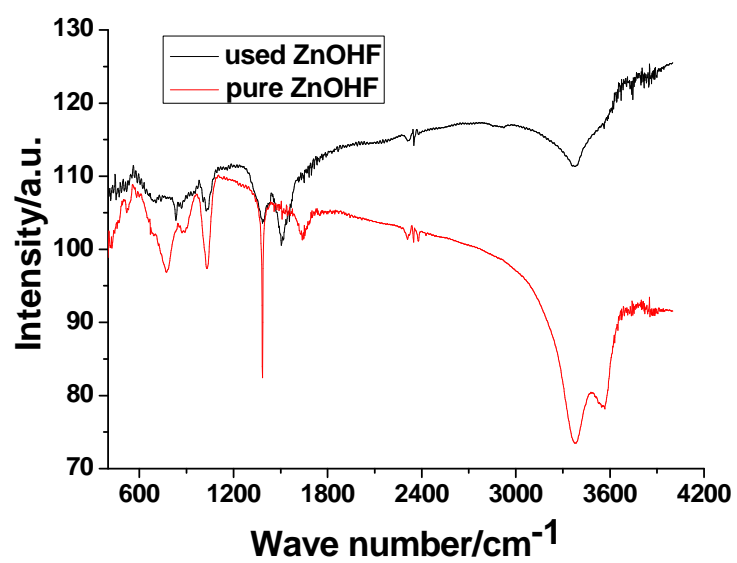

**Fig.4S** The FT-IR spectra of the reused ZnOHF( after reused fourth time) and pure ZnOHF nanofibers
